# Supplementary material for: Cross Sectional and Case-Control Study to Assess Time Trend, Gender Differences and Factors Associated with Physical Activity among Adults with Diabetes: Analysis of the European Health Interview Surveys for Spain (2014 & 2020)
Source: MDPI journal article supplement (doi:10.3390/jcm12062443), 2023-03-22
Supplement: s1 [file s1]

**Table S1.** Definition of variables according to the questions included in the European Health Interview Surveys in Spain conducted in years 2014 and 2020.

| Questions                                                                                                                  | Description and answer                                                                                                                                                                                                                                                                                                                                                                                                                                       | Variables name                               | Categories                                                                                                   |
|----------------------------------------------------------------------------------------------------------------------------|--------------------------------------------------------------------------------------------------------------------------------------------------------------------------------------------------------------------------------------------------------------------------------------------------------------------------------------------------------------------------------------------------------------------------------------------------------------|----------------------------------------------|--------------------------------------------------------------------------------------------------------------|
| Which is your gender?                                                                                                      | 1. Male<br>2. Female                                                                                                                                                                                                                                                                                                                                                                                                                                         | Gender                                       | 1. Men<br>2. Women                                                                                           |
| How old are you?                                                                                                           | Age in years                                                                                                                                                                                                                                                                                                                                                                                                                                                 | Age groups                                   | 1. 15-54<br>2. 55-64<br>3. 65-74<br>4. $\geq 75$                                                             |
| Has your doctor told you that you are suffering from diabetes?                                                             | 1.Yes<br>2.No                                                                                                                                                                                                                                                                                                                                                                                                                                                | Diabetes                                     | 1. Case<br>2. Control                                                                                        |
| Which of these possibilities best describes how often you do some physical activity in your free time?                     | 1. I don't exercise. I occupy my free time almost completely sedentary.<br>2. I do some occasional physical or sports activity<br>3. I do physical activity several times a month<br>4. I do sports or physical training several times a week                                                                                                                                                                                                                | Frequency of physical activity               | 1. Sedentary or low Option 1 and 2<br>2. Medium or high physical activity Option 3 and 4                     |
| How many days, in a typical week, you do sports, gymnastics, bicycling, walking fast for at least 10 minutes continuously? | Number of days (0 to 7)                                                                                                                                                                                                                                                                                                                                                                                                                                      | Number of days of physical activity per week | 1. None or one day<br>2. Two or more days                                                                    |
| What level of education have you completed?                                                                                | 1. Does not know how to read or write<br>2. Incomplete primary education<br>3. Complete primary education<br>4. First stage of Secondary Education, with or without a qualification<br>5. Elementary Spanish Upper Secondary Education<br>6. Upper secondary education<br>7. Intermediate vocational training or equivalent<br>8. Advanced vocational training or equivalent<br>9. University studies or equivalent<br>10. Over university (master, PhD....) | Educational level                            | 1. No studies/Primary: Options 1 to 3<br>2. Secondary: Options 4 to 8<br>3. High education: Options 9 and 10 |
| What is your marital status?                                                                                               | 1. Single<br>2. Married<br>3. Widower<br>4. Separated<br>5. Divorced                                                                                                                                                                                                                                                                                                                                                                                         | Living with a partner                        | 1. Yes: Option 2<br>2. Nor: options 1, 3, 4 and 5                                                            |
| In the past twelve month, how is your perception of your general health status?                                            | 1. Very good<br>2. Good<br>3. Fair<br>4. Bad<br>5. Very bad                                                                                                                                                                                                                                                                                                                                                                                                  | Self-rated health                            | 1. Very good/good: Options 1 and 2<br>2. Fair/poor/very poor: Options 3 to 5                                 |
| Has your doctor told you that you are suffering from COPD?                                                                 | 1.Yes<br>2.No                                                                                                                                                                                                                                                                                                                                                                                                                                                | COPD                                         | 1. Yes<br>2. No                                                                                              |

|                                                                                                                                                                         |                                                                                                                                                                                                                                                                                                |                     |                                                   |
|-------------------------------------------------------------------------------------------------------------------------------------------------------------------------|------------------------------------------------------------------------------------------------------------------------------------------------------------------------------------------------------------------------------------------------------------------------------------------------|---------------------|---------------------------------------------------|
| Has your doctor told you that you are suffering from heart diseases (heart failure or coronary disease)?                                                                | 1.Yes<br>2.No                                                                                                                                                                                                                                                                                  | Heart diseases      | 1. Yes<br>2. No                                   |
| Has your doctor told you that you are suffering from stroke?                                                                                                            | 1.Yes<br>2.No                                                                                                                                                                                                                                                                                  | Stroke              | 1. Yes<br>2. No                                   |
| Has your doctor told you that you are suffering from cancers?                                                                                                           | 1.Yes<br>2.No                                                                                                                                                                                                                                                                                  | Cancer              | 1. Yes<br>2. No                                   |
| Has your doctor told you that you are suffering from anxiety or depression?                                                                                             | 1.Yes<br>2.No                                                                                                                                                                                                                                                                                  | Mental disease      | 1. Yes<br>2. No                                   |
| Has your doctor told you that you are suffering from High blood pressure?                                                                                               | 1.Yes<br>2.No                                                                                                                                                                                                                                                                                  | High blood pressure | 1. Yes<br>2. No                                   |
| During the past 12 months, how often have you had alcoholic beverages of any kind (i.e. beer, wine, spirits, distilled and mixed drinks, or other alcoholic beverages)? | 1. Daily or almost daily<br>2. 5-6 days per week<br>3. 3-4 days per week<br>4. 1-2 days per week<br>5. 2-3 days in a month<br>6. Once a month<br>7. Less than once a month<br>8. Not in the last 12 months, have I stopped drinking<br>9. Never or just a few sips to taste it throughout life | Alcohol consumption | 1. Yes: Options 1 to 6<br>2. No: Option 7 to 9    |
| Could you tell me if you smoke?                                                                                                                                         | 1. Yes, I smoke daily<br>2. Yes, I smoke, but not daily<br>3. I don't currently smoke but have smoked before<br>4. I neither smoke nor have I ever smoked regularly                                                                                                                            | Active smoking      | 1. Yes: Options 1 and 2<br>2. No: Options 3 and 4 |
| 1. Could you tell me how tall you are, approximately, without shoes?<br>2. Could you tell me your weight, approximately, without shoes and clothes?                     | Body mass index is calculated with the formulae:<br>$\text{Weight in kg} / (\text{Height in meters})^2$                                                                                                                                                                                        | Body mass index     | 1. <25<br>2. 25-29.9<br>3. ≥30                    |

COPD, Chronic obstructive pulmonary disease.

**Table S2.** Sensitivity analysis. Variables associated with medium or high physical activity and with number of days per week of physical activity  $\geq 2$  days in the study population. Results of multivariable logistic regression analysis.

|                   |                     | Medium or high physical activity | Number of days per week of physical activity $\geq 2$ days |
|-------------------|---------------------|----------------------------------|------------------------------------------------------------|
|                   |                     | OR (95% CI)                      | OR (95% CI)                                                |
| Gender            | Female              | 1                                | 1                                                          |
|                   | Male                | 1.42 (1.28-1.58)                 | 1.15 (1.02-1.24)                                           |
| Age groups        | $\geq 75$ years     | 1                                | 1                                                          |
|                   | 65-74 years         | 2.25 (1.99-2.55)                 | 2.08 (1.80-2.40)                                           |
|                   | 55-64 years         | 1.86 (1.61-2.16)                 | 1.73 (1.45-2.04)                                           |
|                   | 18-54 years         | 1.63 (1.37-1.93)                 | 1.33 (1.09-1.61)                                           |
| Educational level | No studies/primary  | 1                                | 1                                                          |
|                   | Secondary           | 1.51 (1.29-1.78)                 | 1.45 (1.18-1.78)                                           |
|                   | High education      | 1.58 (1.36-1.84)                 | 1.18 (1.01-1.68)                                           |
| Self-rated health | Fair/poor/very poor | 1                                | 1                                                          |
|                   | Very good/good      | 2.10 (1.88-2.34)                 | 1.95 (1.71-2.23)                                           |
| COPD              | No                  | 1                                | 1                                                          |
|                   | Yes                 | 0.70 (0.58-0.84)                 | 0.67 (0.56-0.81)                                           |
| Heart diseases    | No                  | 1                                | 1                                                          |
|                   | Yes                 | 0.85 (0.75-0.97)                 | 0.85 (0.74-0.98)                                           |
| Stroke            | No                  | -                                | 1                                                          |
|                   | Yes                 | NIFM                             | 0.72 (0.57-0.91)                                           |
| Mental disorder   | No                  | 1                                | 1                                                          |
|                   | Yes                 | 0.78 (0.69-0.89)                 | 0.69 (0.60-0.79)                                           |
| Active smoking    | No                  | 1                                | -                                                          |
|                   | Yes                 | 0.70 (0.61-0.71)                 | NIFM                                                       |
| Body mass index   | $\geq 30$           | 1                                | 1                                                          |
|                   | 25-29.9             | 1.46 (1.29-1.65)                 | 1.52 (1.32-1.74)                                           |
|                   | <25                 | 1.53 (1.34-1.74)                 | 1.54 (1.33-1.79)                                           |
| Year              | 2014                | 1                                | 1                                                          |
|                   | 2020                | 0.97 (0.88-1.08)                 | 1.40 (1.25-1.57)                                           |
| Diabetes          | No                  | 1                                | 1                                                          |
|                   | Yes                 | 0.87 (0.86-0.96)                 | 0.91 (0.82-0.99)                                           |

OR Odds ratios CI Confidence interval. COPD, Chronic obstructive pulmonary disease. NIFM. Not included in final the model.
