# Supplementary figures and images for: Cross Sectional and Case-Control Study to Assess Time Trend, Gender Differences and Factors Associated with Physical Activity among Adults with Diabetes: Analysis of the European Health Interview Surveys for Spain (2014 & 2020)
Source: MDPI journal article supplement (doi:10.3390/jcm12062443), 2023-03-22

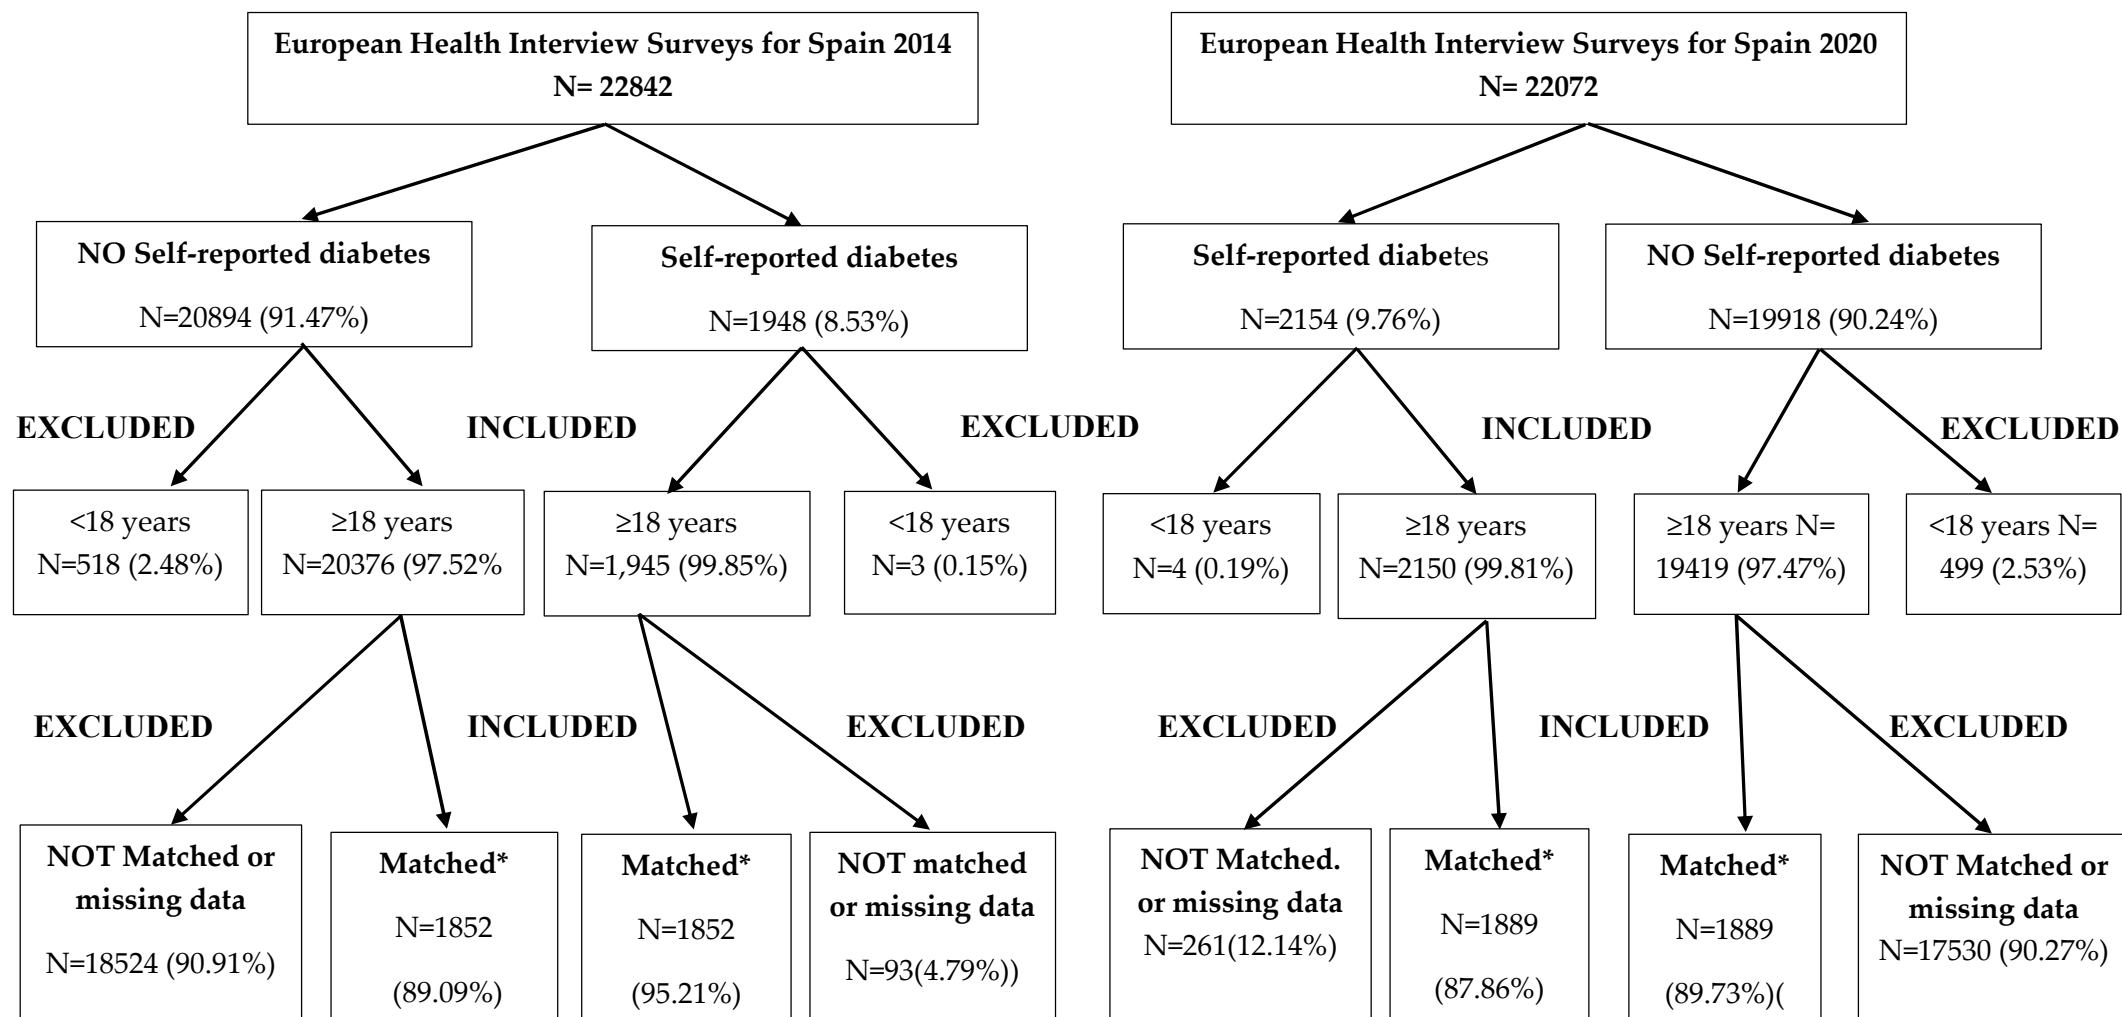

\*Matched by age-gender and region of residence

**Figure S1. Flowchart of participant's selection.**

Supplement: s1 [file s1]
